# Supplementary material
Source: Springer Nature journal article supplement (https://www.springermedizin.de/resource/supplementary/12985_2009_642_MOESM2_ESM.pdf/9608170)

(A)

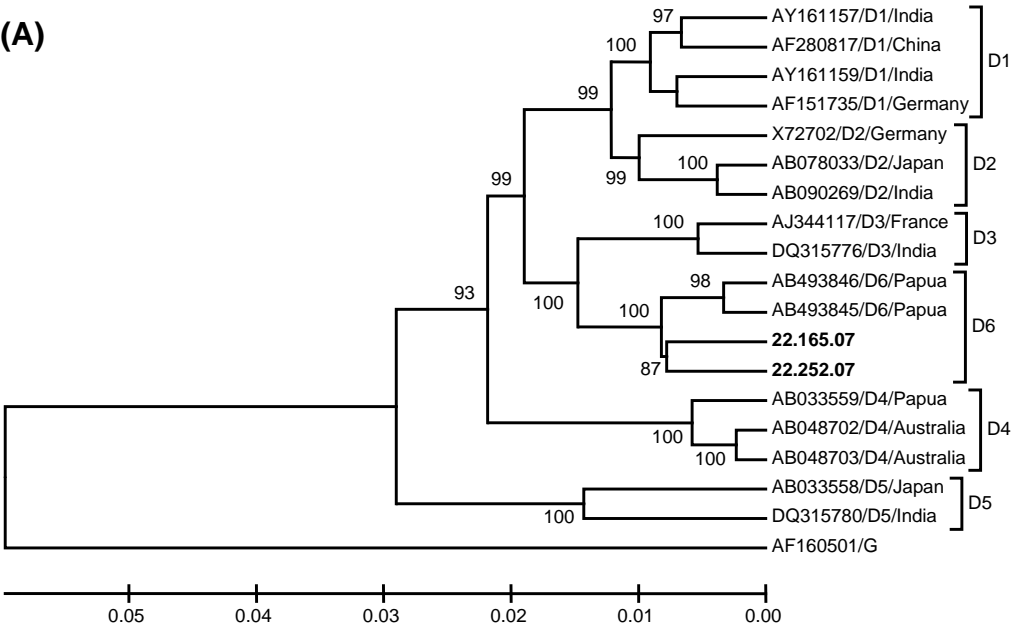

(B)

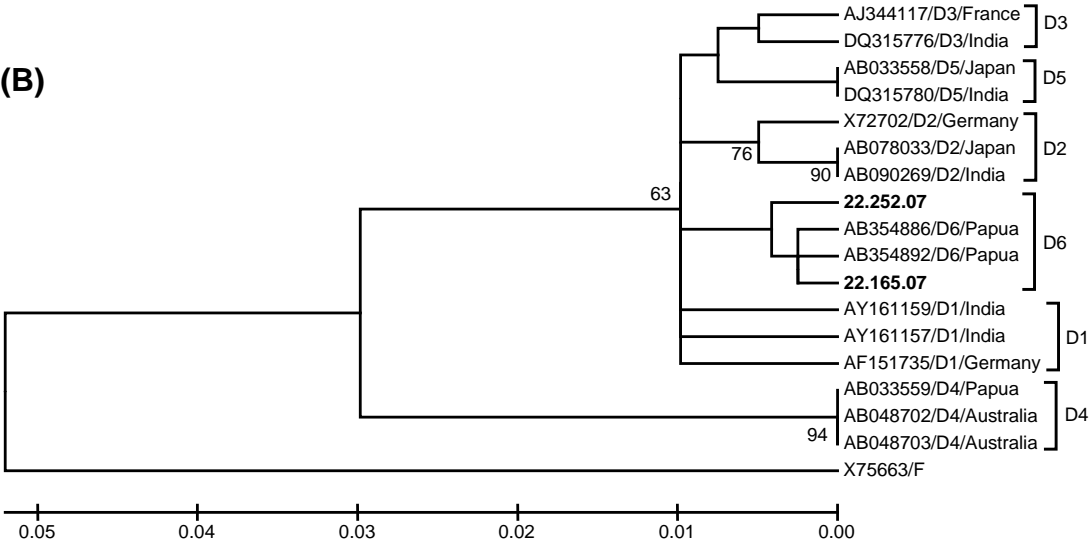

(C)

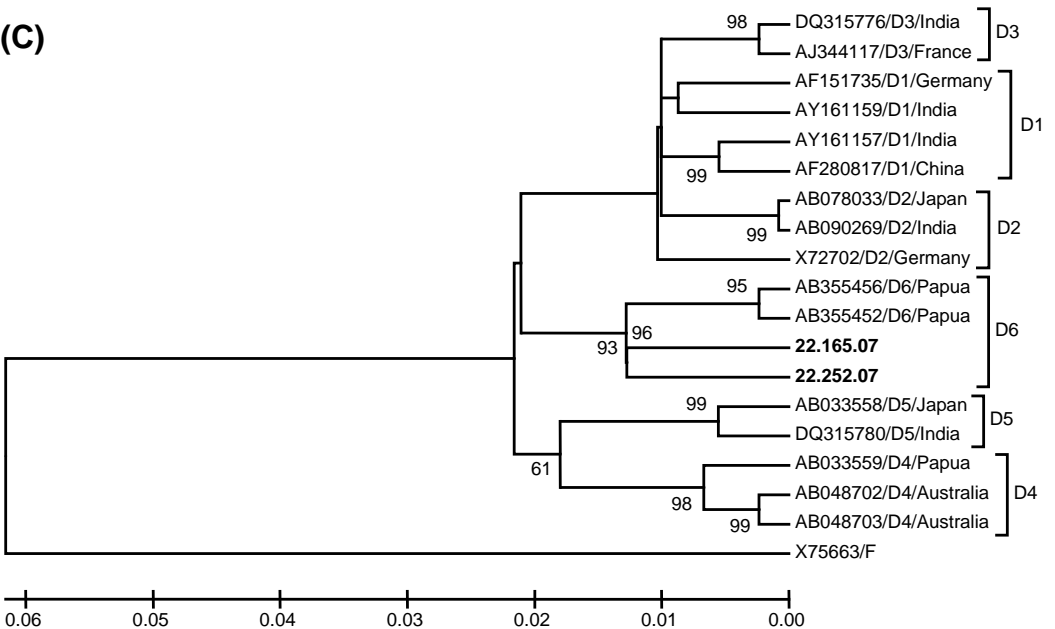

Supplement: MOESM2 [file 9608170]
